# Supplementary material
Source: PubMed Central journal article supplement (PMC4438214)
Supplement: JB.00030-15_zjb999093630so1.pdf [file JB.00030-15_zjb999093630so1.pdf]

**Supplemental information**

**Secretion of flagellar proteins by the**

***Pseudomonas aeruginosa* type III secretion-injectisome system**

**Dilek Ince, Fayyaz S. Sutterwala, and Timothy L. Yahr**

Table S1. Bacterial strains used in this study

| Strain                                             | Relevant characteristics                                        | Reference  |
|----------------------------------------------------|-----------------------------------------------------------------|------------|
| <i>Escherichia coli</i>                            |                                                                 |            |
| DH5 $\alpha$                                       | <i>recA</i> cloning strain                                      | (1)        |
| Sm10 $\lambda$ pir                                 | conjugation to <i>P. aeruginosa</i>                             | (2)        |
| <i>Pseudomonas aeruginosa</i>                      |                                                                 |            |
| PAK                                                | wild-type laboratory strain                                     | (3)        |
| PAK $\Delta$ <i>fliC</i>                           | deletion mutant lacking <i>fliC</i>                             | (4)        |
| PAK $\Delta$ <i>exoSTY</i>                         | deletion mutant lacking <i>exoS</i> , <i>exoT</i> , <i>exoY</i> | (5)        |
| PAK <i>exsA</i> :: $\Omega$                        | insertion mutant in <i>exsA</i>                                 | (6)        |
| PAK $\Delta$ <i>flhB</i>                           | deletion mutant lacking <i>flhB</i>                             | This study |
| PAK <i>exsA</i> :: $\Omega$ , $\Delta$ <i>flhB</i> | double <i>exsA</i> , <i>flhB</i> mutant                         | This study |
| PAK $\Delta$ <i>exoSTY</i> , $\Delta$ <i>flhB</i>  | $\Delta$ <i>exoSTY</i> mutant lacking <i>flhB</i>               | This study |
| PAK $\Delta$ <i>exoSTY</i> , $\Delta$ <i>fliC</i>  | $\Delta$ <i>exoSTY</i> mutant lacking <i>fliC</i>               | This study |
| PAK $\Delta$ <i>pscC</i>                           | deletion mutant lacking <i>pscC</i>                             | (7)        |

Table S2. Plasmids used in this study

| Plasmid                                         | Relevant characteristics                                         | Reference     |
|-------------------------------------------------|------------------------------------------------------------------|---------------|
| pJN105                                          | Arabinose inducible expression vector                            | (8)           |
| pEX18Gm                                         | Allelic exchange vector, <i>sacB</i> marker, Gm <sup>R</sup>     | (9)           |
| pNMD60                                          | Source of <i>B. pertussis cyaA</i> gene                          | N. Carbonetti |
| pUY30                                           | pJN105 with ExsE-CyaA fusion                                     | (10)          |
| pExsE-VSV                                       | pJN105 expressing ExsE-VSV                                       | This study    |
| pExsE-VSV-IAD                                   | pJN105 expressing ExsE-VSV-IAD                                   | This study    |
| pFliC                                           | pJN105 expressing full-length FliC                               | This study    |
| pFliC-VSV                                       | pJN105 expressing VSV-tagged FliC                                | This study    |
| pFliC <sub>1-20</sub> -CyaA                     | pJN105 expressing FliC <sub>1-20</sub> -CyaA fusion              | This study    |
| pFliC <sub>1-394</sub> -CyaA                    | pJN105 expressing FliC <sub>1-394</sub> -CyaA fusion             | This study    |
| pFliC <sub>1-100</sub> -VSV <sup>-101-394</sup> | pJN105 expressing FliC <sub>1-100</sub> -VSV <sup>-101-394</sup> | This study    |
| pFliC <sub>1-100</sub> -VSV-IAD                 | pJN105 expressing FliC <sub>1-100</sub> -VSV-IAD                 | This study    |
| pFliC <sub>1-20</sub> -VSV-IAD                  | pJN105 expressing FliC <sub>1-20</sub> -VSV-IAD                  | This study    |
| pFliD                                           | pJN105 expressing FliD                                           | This study    |
| pFliD <sub>VSV</sub>                            | pJN105 expressing VSV-tagged FliD                                | This study    |
| pFliD-IAD                                       | pJN105 expressing FliD-IAD fusion                                | This study    |
| pFlgK                                           | pJN105 expressing FlgK                                           | This study    |
| pFlgK <sub>VSV</sub>                            | pJN105 expressing VSV-tagged FlgK                                | This study    |
| pFlgK-IAD                                       | pJN105 expressing FlgK-IAD fusion                                | This study    |
| pFlgL                                           | pJN105 expressing FlgL                                           | This study    |
| pFlgL <sub>VSV</sub>                            | pJN105 expressing VSV-tagged FlgL                                | This study    |
| pFlgL-IAD                                       | pJN105 expressing FlgL-IAD fusion                                | This study    |
| pFlgE                                           | pJN105 expressing FlgE                                           | This study    |
| pFlgE <sub>VSV</sub>                            | pJN105 expressing VSV-tagged FlgE                                | This study    |
| pFlgE-IAD                                       | pJN105 expressing FlgE-IAD fusion                                | This study    |
| pFlgB                                           | pJN105 expressing FlgB                                           | This study    |
| pFlgB <sub>VSV</sub>                            | pJN105 expressing VSV-tagged FlgB                                | This study    |
| pFlgB-IAD                                       | pJN105 expressing FlgB-IAD fusion                                | This study    |
| pEB124                                          | pJN105 derivative expressing <i>exsA</i>                         | (11)          |

Table S3. Primers used in this study.

| Primer ID | Primer Sequence                                                                  |
|-----------|----------------------------------------------------------------------------------|
| 35521313  | 5'-AAAATCTAGAGCGCAGCAGGCTCAGAACC                                                 |
| 35521314  | 5'-AAACATATGGCCTTGACCGTCAACACC                                                   |
| 36637503  | 5'-AAAATCTAGAGGCCGACTGCAGGGACAGG                                                 |
| 36965155  | 5'-TTTTCTAGAGTTGTTTCAGGTTCCGC                                                    |
| 37090298  | 5'-GGTCATATGAGTTTCAACATCGGCCTGAGCGG                                              |
| 37132649  | 5'-AAAACATATGGCGAACAGTACGACGATCAA                                                |
| 37794979  | 5'-CCAGCATATGTCCGACCTACTCTCGATAGGCCT                                             |
| 37975890  | 5'-AGTACATATGAGCATCAGTTTTCGACAGAGCAC                                             |
| 37975891  | 5'-GCATGAATTCCCGTAGATGAAGGACACCGCGCTGA                                           |
| 37975892  | 5'-ACGAGGATCCGACGAGTGACCTGGCTGGAGCTAC                                            |
| 37975893  | 5'-ACGAGGATCCCTCGGCCATGGCTATTTTCGCCCGC                                           |
| 37975894  | 5'-GAAGAAGCTTACGGCGATGATCGTCGGCGTGCTG                                            |
| 38040753  | 5'-CCAGCATATGCGCATTTCACCCATCCAGGCCT                                              |
| 39481304  | 5'-TCTAGAGCTCTCATTTTCCTAATCTATTTCATTTCAATATCTGTATATCTAGAG<br>CGCAGCAGGCTCAGAACGG |
| 43468728  | 5'-AAAATCTAGAGCGCAGGTTGATGATGGTCTGG                                              |
| 43468729  | 5'-AAAATCTAGACTCTCCACGCAGGGCGCTGACC                                              |
| 43468730  | 5'-TTTTTCTAGACTTCAGGTAGTTGAACAGGCTCAACC                                          |
| 43468731  | 5'-AAAATCTAGAACGGAAAGGGTATCGAACAAAGTGC                                           |
| 43468732  | 5'-TTTTTCTAGAGCTTTTCTTCACAAGGCCAGGCAGG                                           |
| 43812189  | 5'-GATAGAATTCTCGAGGCCATGCGGCGGATGC                                               |
| 43933210  | 5'-GTGAAAGCTTAGAGCTCGAACATCGGTACCTTGC                                            |
| 47100509  | 5'-TTTTGAGCTCTTAGCGCAGCAGGCTCAGAACCGAC                                           |
| 47481608  | 5'-AAAAGAGCTCAGCGCAGGTTGATGATGGTCTGG                                             |
| 47481609  | 5'-AAAAGAGCTCTTACTCTCCACGCAGGGCGCTGACC                                           |
| 47481610  | 5'-TTTTGAGCTCACTTCAGGTAGTTGAACAGGCTCAACC                                         |
| 47481611  | 5'-AAAAGAGCTCAACGGAAAGGGTATCGAACAAAGTGC                                          |
| 47481612  | 5'-TTTTGAGCTCAGCTTTTCTTCACAAGGCCAGGCAGG                                          |
| 53931313  | 5'-AAAATCTAGATATACAGATATTGAAATGAATAGATTAGGAAAAGACACCGA<br>CTTCGCAGCCGAAACC       |
| 54300848  | 5'-AAAATCTAGATATACAGATATTGAAATGAATAGATTAGGAAAAACGGCTC<br>CAACAGCGACTCCGAGC       |

Table S4. Construction of plasmids used in this study.

| Figure   | Product                                        | Primer Pair(s)                         | Cloning vector                                 |
|----------|------------------------------------------------|----------------------------------------|------------------------------------------------|
| N/A      | pEX18Gm $\Delta$ <i>fliB</i>                   | 37975891-37975892<br>37975893-37975894 | pEX18Gm                                        |
| N/A      | pEX18Gm $\Delta$ <i>fliC</i>                   | 43812189-43933210                      | pEX18Gm                                        |
| N/A      | pFliC-VSV                                      | 35521314-39481304                      | pUY30                                          |
| Fig. 2-3 | pFliC                                          | 35521314-47100509                      | pUY30                                          |
| Fig. 4   | pFliC <sub>1-20</sub> -CyaA                    | 35521314-36965155                      | pUY30                                          |
| Fig. 4   | pFliC <sub>1-394</sub> -CyaA                   | 35521314-35521313                      | pUY30                                          |
| Fig. 5   | FliC <sub>1-100</sub> -VSV <sub>-101-394</sub> | 35521314-36637503<br>54300848-47100509 | pUY30                                          |
| Fig. 5   | FliC <sub>1-100</sub> -VSV-IAD                 | 53931313-47100509                      | FliC <sub>1-100</sub> -VSV <sub>-101-394</sub> |
| Fig. 5   | FliC <sub>1-20</sub> -VSV-IAD                  | 35521314-36965155                      | FliC <sub>1-100</sub> -VSV-IAD                 |
| Fig. 6   | pFliD <sub>vsv</sub>                           | 37132649-43468732                      | pFliC-VSV                                      |
| Fig. 6   | pFlgK <sub>vsv</sub>                           | 37794979-43468731                      | pFliC-VSV                                      |
| Fig. 6   | pFlgL <sub>vsv</sub>                           | 38040753-43468730                      | pFliC-VSV                                      |
| Fig. 6   | pFlgE <sub>vsv</sub>                           | 37090298-43468728                      | pFliC-VSV                                      |
| Fig. 6   | pFlgB <sub>vsv</sub>                           | 37975890-43468729                      | pFliC-VSV                                      |
| Fig. 7   | pFliD                                          | 37132649-47481612                      | pUY30                                          |
| Fig. 7   | pFlgK                                          | 37794979-47481611                      | pUY30                                          |
| Fig. 7   | pFlgL                                          | 38040753-47481610                      | pUY30                                          |
| Fig. 7   | pFlgE                                          | 37090298-47481608                      | pUY30                                          |
| Fig. 7   | pFlgB                                          | 37975890-47481609                      | pUY30                                          |
| Fig. 7   | pFliD-IAD                                      | 37132649-43468732                      | FliC <sub>1-100</sub> -VSV-IAD                 |
| Fig. 7   | pFlgK-IAD                                      | 37794979-43468731                      | FliC <sub>1-100</sub> -VSV-IAD                 |
| Fig. 7   | pFlgL-IAD                                      | 38040753-43468730                      | FliC <sub>1-100</sub> -VSV-IAD                 |
| Fig. 7   | pFlgE-IAD                                      | 37090298-43468728                      | FliC <sub>1-100</sub> -VSV-IAD                 |
| Fig. 7   | pFlgB-IAD                                      | 37975890-43468729                      | FliC <sub>1-100</sub> -VSV-IAD                 |

## REFERENCES

1. **Hanahan D.** 1983. Studies on transformation of *Escherichia coli* with plasmids. *J Mol Biol* **166**:557-580.
2. **Simon R, Priefer U, Puhler A.** 1983. A broad host range mobilization system for in vivo genetic engineering: transposon mutagenesis in Gram negative bacteria. *Nature Biotechnology* **1**:784-791.
3. **Takeya K, Amako K.** 1966. A rod-shaped *Pseudomonas* phage. *Virology* **28**:163-165.
4. **Dasgupta N, Wolfgang MC, Goodman AL, Arora SK, Jyot J, Lory S, Ramphal R.** 2003. A four-tiered transcriptional regulatory circuit controls flagellar biogenesis in *Pseudomonas aeruginosa*. *Mol Microbiol* **50**:809-824.
5. **Lee VT, Smith RS, Tummeler B, Lory S.** 2005. Activities of *Pseudomonas aeruginosa* effectors secreted by the Type III secretion system in vitro and during infection. *Infect Immun* **73**:1695-1705.
6. **Frank DW, Nair G, Schweizer HP.** 1994. Construction and characterization of chromosomal insertional mutations of the *Pseudomonas aeruginosa* exoenzyme S trans-regulatory locus. *Infect Immun* **62**:554-563.
7. **Rietsch A, Vallet-Gely I, Dove SL, Mekalanos JJ.** 2005. ExsE, a secreted regulator of type III secretion genes in *Pseudomonas aeruginosa*. *Proc Natl Acad Sci U S A* **102**:8006-8011.
8. **Newman JR, Fuqua C.** 1999. Broad-host-range expression vectors that carry the L-arabinose-inducible *Escherichia coli* araBAD promoter and the araC regulator. *Gene* **227**:197-203.
9. **Hoang TT, Karkhoff-Schweizer RR, Kutchma AJ, Schweizer HP.** 1998. A broad-host-range Flp-FRT recombination system for site-specific excision of chromosomally-located DNA sequences: application for isolation of unmarked *Pseudomonas aeruginosa* mutants. *Gene* **212**:77-86.
10. **Urbanowski ML, Brutinel ED, Yahr TL.** 2007. Translocation of ExsE into Chinese hamster ovary cells is required for transcriptional induction of the *Pseudomonas aeruginosa* type III secretion system. *Infect Immun* **75**:4432-4439.
11. **Brutinel ED, Vakulskas CA, Brady KM, Yahr TL.** 2008. Characterization of ExsA and of ExsA-dependent promoters required for expression of the *Pseudomonas aeruginosa* type III secretion system. *Mol Microbiol* **68**:657-671.
